# Supplementary material for: Transcriptomic Evidence of Adaptive Evolution of the Epiphytic Fern Asplenium nidus
Source: Int J Genomics. 2019 Dec 1;2019:1429316. doi: 10.1155/2019/1429316 (PMC6913284; doi:10.1155/2019/1429316)
Supplement: Supplementary 2 — Table S1: the enrichment of specific genes in A. nidus. [file 1429316.f2.xlsx]

## Sheet: Enrichment by clusterProfiler
Table S1. The enrichment of specific genes in A. nidus
GO term	Description	Gene Ratio	Bg Ratio	p-value	p.adjust	qvalue	geneID
GO:0042886	amide transport	163/3096	437/11857	1.07099e-07	0.000117379	0.00011346	CL318.Contig1_RS259A/CL546.Contig1_RS259A/CL622.Contig1_RS259A/CL627.Contig5_RS259A/CL642.Contig3_RS259A/CL642.Contig5_RS259A/CL811.Contig3_RS259A/CL858.Contig2_RS259A/CL1240.Contig2_RS259A/CL1240.Contig3_RS259A/CL1500.Contig1_RS259A/CL1500.Contig2_RS259A/CL1669.Contig1_RS259A/CL1669.Contig2_RS259A/CL1909.Contig3_RS259A/CL2098.Contig1_RS259A/CL2109.Contig3_RS259A/CL2225.Contig3_RS259A/CL2225.Cont…
GO:0015833	peptide transport	160/3096	430/11857	1.68286e-07	0.000117379	0.00011346	CL318.Contig1_RS259A/CL546.Contig1_RS259A/CL622.Contig1_RS259A/CL627.Contig5_RS259A/CL642.Contig3_RS259A/CL642.Contig5_RS259A/CL811.Contig3_RS259A/CL858.Contig2_RS259A/CL1240.Contig2_RS259A/CL1240.Contig3_RS259A/CL1500.Contig1_RS259A/CL1500.Contig2_RS259A/CL1669.Contig1_RS259A/CL1669.Contig2_RS259A/CL1909.Contig3_RS259A/CL2098.Contig1_RS259A/CL2109.Contig3_RS259A/CL2225.Contig3_RS259A/CL2225.Cont…
GO:0015031	protein transport	157/3096	424/11857	3.12999e-07	0.000129729	0.000125397	CL318.Contig1_RS259A/CL546.Contig1_RS259A/CL622.Contig1_RS259A/CL627.Contig5_RS259A/CL642.Contig3_RS259A/CL642.Contig5_RS259A/CL811.Contig3_RS259A/CL858.Contig2_RS259A/CL1240.Contig2_RS259A/CL1240.Contig3_RS259A/CL1500.Contig1_RS259A/CL1500.Contig2_RS259A/CL1669.Contig1_RS259A/CL1669.Contig2_RS259A/CL1909.Contig3_RS259A/CL2098.Contig1_RS259A/CL2225.Contig3_RS259A/CL2225.Contig8_RS259A/CL2225.Cont…
GO:0051641	cellular localization	174/3096	480/11857	3.71982e-07	0.000129729	0.000125397	CL318.Contig1_RS259A/CL622.Contig1_RS259A/CL627.Contig5_RS259A/CL858.Contig2_RS259A/CL1240.Contig2_RS259A/CL1240.Contig3_RS259A/CL1358.Contig1_RS259A/CL1500.Contig1_RS259A/CL1500.Contig2_RS259A/CL1634.Contig2_RS259A/CL1634.Contig3_RS259A/CL1634.Contig4_RS259A/CL1669.Contig1_RS259A/CL1669.Contig2_RS259A/CL1909.Contig3_RS259A/CL2098.Contig1_RS259A/CL2225.Contig3_RS259A/CL2225.Contig8_RS259A/CL2225.…
GO:0045184	establishment of protein localization	158/3096	430/11857	4.98775e-07	0.000139158	0.000134512	CL318.Contig1_RS259A/CL546.Contig1_RS259A/CL622.Contig1_RS259A/CL627.Contig5_RS259A/CL642.Contig3_RS259A/CL642.Contig5_RS259A/CL811.Contig3_RS259A/CL858.Contig2_RS259A/CL1240.Contig2_RS259A/CL1240.Contig3_RS259A/CL1500.Contig1_RS259A/CL1500.Contig2_RS259A/CL1669.Contig1_RS259A/CL1669.Contig2_RS259A/CL1909.Contig3_RS259A/CL2098.Contig1_RS259A/CL2225.Contig3_RS259A/CL2225.Contig8_RS259A/CL2225.Cont…
GO:0046907	intracellular transport	147/3096	397/11857	7.45659e-07	0.000148599	0.000143637	CL318.Contig1_RS259A/CL622.Contig1_RS259A/CL627.Contig5_RS259A/CL858.Contig2_RS259A/CL1240.Contig2_RS259A/CL1240.Contig3_RS259A/CL1500.Contig1_RS259A/CL1500.Contig2_RS259A/CL1669.Contig1_RS259A/CL1669.Contig2_RS259A/CL1909.Contig3_RS259A/CL2098.Contig1_RS259A/CL2225.Contig3_RS259A/CL2225.Contig8_RS259A/CL2225.Contig9_RS259A/CL2225.Contig11_RS259A/CL2382.Contig3_RS259A/CL2443.Contig2_RS259A/CL2443…
GO:0051649	establishment of localization in cell	147/3096	397/11857	7.45659e-07	0.000148599	0.000143637	CL318.Contig1_RS259A/CL622.Contig1_RS259A/CL627.Contig5_RS259A/CL858.Contig2_RS259A/CL1240.Contig2_RS259A/CL1240.Contig3_RS259A/CL1500.Contig1_RS259A/CL1500.Contig2_RS259A/CL1669.Contig1_RS259A/CL1669.Contig2_RS259A/CL1909.Contig3_RS259A/CL2098.Contig1_RS259A/CL2225.Contig3_RS259A/CL2225.Contig8_RS259A/CL2225.Contig9_RS259A/CL2225.Contig11_RS259A/CL2382.Contig3_RS259A/CL2443.Contig2_RS259A/CL2443…
GO:0008104	protein localization	172/3096	480/11857	1.0181e-06	0.000177532	0.000171604	CL318.Contig1_RS259A/CL546.Contig1_RS259A/CL622.Contig1_RS259A/CL627.Contig5_RS259A/CL642.Contig3_RS259A/CL642.Contig5_RS259A/CL811.Contig3_RS259A/CL858.Contig2_RS259A/CL1240.Contig2_RS259A/CL1240.Contig3_RS259A/CL1358.Contig1_RS259A/CL1500.Contig1_RS259A/CL1500.Contig2_RS259A/CL1634.Contig2_RS259A/CL1634.Contig3_RS259A/CL1634.Contig4_RS259A/CL1669.Contig1_RS259A/CL1669.Contig2_RS259A/CL1909.Cont…
GO:0048583	regulation of response to stimulus	51/3096	107/11857	1.24926e-06	0.000193636	0.00018717	CL35.Contig5_RS259A/CL35.Contig10_RS259A/CL799.Contig1_RS259A/CL1143.Contig5_RS259A/CL2853.Contig3_RS259A/CL3752.Contig2_RS259A/CL4380.Contig1_RS259A/CL4642.Contig1_RS259A/CL4918.Contig4_RS259A/CL5175.Contig2_RS259A/CL5284.Contig1_RS259A/CL5532.Contig1_RS259A/CL5532.Contig2_RS259A/CL5932.Contig1_RS259A/CL6972.Contig1_RS259A/CL8218.Contig2_RS259A/CL9443.Contig2_RS259A/CL9878.Contig2_RS259A/CL10626…
GO:0006886	intracellular protein transport	129/3096	344/11857	1.65013e-06	0.000230194	0.000222508	CL318.Contig1_RS259A/CL622.Contig1_RS259A/CL627.Contig5_RS259A/CL858.Contig2_RS259A/CL1240.Contig2_RS259A/CL1240.Contig3_RS259A/CL1500.Contig1_RS259A/CL1500.Contig2_RS259A/CL1669.Contig1_RS259A/CL1669.Contig2_RS259A/CL1909.Contig3_RS259A/CL2098.Contig1_RS259A/CL2225.Contig3_RS259A/CL2225.Contig8_RS259A/CL2225.Contig9_RS259A/CL2225.Contig11_RS259A/CL2382.Contig3_RS259A/CL2443.Contig2_RS259A/CL2443…
GO:0070727	cellular macromolecule localization	148/3096	413/11857	5.75951e-06	0.00073041	0.000706022	CL318.Contig1_RS259A/CL622.Contig1_RS259A/CL627.Contig5_RS259A/CL858.Contig2_RS259A/CL1240.Contig2_RS259A/CL1240.Contig3_RS259A/CL1358.Contig1_RS259A/CL1500.Contig1_RS259A/CL1500.Contig2_RS259A/CL1634.Contig2_RS259A/CL1634.Contig3_RS259A/CL1634.Contig4_RS259A/CL1669.Contig1_RS259A/CL1669.Contig2_RS259A/CL1909.Contig3_RS259A/CL2098.Contig1_RS259A/CL2225.Contig3_RS259A/CL2225.Contig8_RS259A/CL2225.…
GO:0034613	cellular protein localization	146/3096	408/11857	7.26198e-06	0.000844205	0.000816017	CL318.Contig1_RS259A/CL622.Contig1_RS259A/CL627.Contig5_RS259A/CL858.Contig2_RS259A/CL1240.Contig2_RS259A/CL1240.Contig3_RS259A/CL1358.Contig1_RS259A/CL1500.Contig1_RS259A/CL1500.Contig2_RS259A/CL1634.Contig2_RS259A/CL1634.Contig3_RS259A/CL1634.Contig4_RS259A/CL1669.Contig1_RS259A/CL1669.Contig2_RS259A/CL1909.Contig3_RS259A/CL2098.Contig1_RS259A/CL2225.Contig3_RS259A/CL2225.Contig8_RS259A/CL2225.…
GO:0034504	protein localization to nucleus	33/3096	64/11857	1.17396e-05	0.00124721	0.00120556	CL858.Contig2_RS259A/CL1500.Contig1_RS259A/CL1500.Contig2_RS259A/CL1634.Contig2_RS259A/CL1634.Contig3_RS259A/CL1634.Contig4_RS259A/CL4378.Contig2_RS259A/CL4378.Contig3_RS259A/CL4971.Contig2_RS259A/CL4971.Contig3_RS259A/CL4971.Contig6_RS259A/CL5366.Contig1_RS259A/CL10647.Contig2_RS259A/CL10998.Contig2_RS259A/CL10998.Contig3_RS259A/CL13910.Contig1_RS259A/CL13910.Contig2_RS259A/Unigene3812_RS259A/Un…
GO:0006607	NLS-bearing protein import into nucleus	21/3096	34/11857	1.25168e-05	0.00124721	0.00120556	CL1500.Contig1_RS259A/CL1500.Contig2_RS259A/CL4378.Contig2_RS259A/CL4378.Contig3_RS259A/CL4971.Contig2_RS259A/CL4971.Contig3_RS259A/CL4971.Contig6_RS259A/CL5366.Contig1_RS259A/CL10647.Contig2_RS259A/CL10998.Contig2_RS259A/CL10998.Contig3_RS259A/CL13910.Contig1_RS259A/CL13910.Contig2_RS259A/Unigene11890_RS259A/Unigene13660_RS259A/Unigene28813_RS259A/Unigene33877_RS259A/Unigene34633_RS259A/Unigene3…
GO:0000060	protein import into nucleus, translocation	16/3096	23/11857	1.56986e-05	0.00136872	0.00132302	CL4378.Contig2_RS259A/CL4378.Contig3_RS259A/CL4971.Contig2_RS259A/CL4971.Contig3_RS259A/CL4971.Contig6_RS259A/CL5366.Contig1_RS259A/CL10998.Contig2_RS259A/CL10998.Contig3_RS259A/CL13910.Contig1_RS259A/CL13910.Contig2_RS259A/Unigene13660_RS259A/Unigene28813_RS259A/Unigene33877_RS259A/Unigene34633_RS259A/Unigene37540_RS259A/Unigene43535_RS259A
GO:0006610	ribosomal protein import into nucleus	16/3096	23/11857	1.56986e-05	0.00136872	0.00132302	CL4378.Contig2_RS259A/CL4378.Contig3_RS259A/CL4971.Contig2_RS259A/CL4971.Contig3_RS259A/CL4971.Contig6_RS259A/CL5366.Contig1_RS259A/CL10998.Contig2_RS259A/CL10998.Contig3_RS259A/CL13910.Contig1_RS259A/CL13910.Contig2_RS259A/Unigene13660_RS259A/Unigene28813_RS259A/Unigene33877_RS259A/Unigene34633_RS259A/Unigene37540_RS259A/Unigene43535_RS259A
GO:0072594	establishment of protein localization to organelle	68/3096	168/11857	3.05464e-05	0.0025066	0.00242291	CL622.Contig1_RS259A/CL858.Contig2_RS259A/CL1500.Contig1_RS259A/CL1500.Contig2_RS259A/CL1669.Contig1_RS259A/CL1669.Contig2_RS259A/CL2225.Contig3_RS259A/CL2225.Contig8_RS259A/CL2225.Contig9_RS259A/CL2225.Contig11_RS259A/CL2443.Contig2_RS259A/CL2443.Contig3_RS259A/CL3300.Contig3_RS259A/CL3424.Contig2_RS259A/CL3864.Contig2_RS259A/CL3864.Contig3_RS259A/CL3868.Contig4_RS259A/CL4085.Contig3_RS259A/CL43…
GO:0016192	vesicle-mediated transport	109/3096	299/11857	4.2478e-05	0.00329204	0.00318212	CL318.Contig1_RS259A/CL334.Contig2_RS259A/CL546.Contig1_RS259A/CL627.Contig5_RS259A/CL642.Contig3_RS259A/CL642.Contig5_RS259A/CL1240.Contig2_RS259A/CL1240.Contig3_RS259A/CL1669.Contig1_RS259A/CL1669.Contig2_RS259A/CL1869.Contig3_RS259A/CL1875.Contig9_RS259A/CL1909.Contig3_RS259A/CL2471.Contig2_RS259A/CL2536.Contig3_RS259A/CL2842.Contig1_RS259A/CL2842.Contig2_RS259A/CL2854.Contig1_RS259A/CL2873.Co…
GO:0007265	Ras protein signal transduction	10/3096	12/11857	5.60715e-05	0.00340086	0.0032873	CL4918.Contig4_RS259A/CL5175.Contig2_RS259A/CL5532.Contig1_RS259A/CL5532.Contig2_RS259A/CL13310.Contig2_RS259A/CL13310.Contig3_RS259A/Unigene846_RS259A/Unigene1030_RS259A/Unigene17066_RS259A/Unigene38068_RS259A
GO:0032011	ARF protein signal transduction	10/3096	12/11857	5.60715e-05	0.00340086	0.0032873	CL4918.Contig4_RS259A/CL5175.Contig2_RS259A/CL5532.Contig1_RS259A/CL5532.Contig2_RS259A/CL13310.Contig2_RS259A/CL13310.Contig3_RS259A/Unigene846_RS259A/Unigene1030_RS259A/Unigene17066_RS259A/Unigene38068_RS259A
GO:0032012	regulation of ARF protein signal transduction	10/3096	12/11857	5.60715e-05	0.00340086	0.0032873	CL4918.Contig4_RS259A/CL5175.Contig2_RS259A/CL5532.Contig1_RS259A/CL5532.Contig2_RS259A/CL13310.Contig2_RS259A/CL13310.Contig3_RS259A/Unigene846_RS259A/Unigene1030_RS259A/Unigene17066_RS259A/Unigene38068_RS259A
GO:0046578	regulation of Ras protein signal transduction	10/3096	12/11857	5.60715e-05	0.00340086	0.0032873	CL4918.Contig4_RS259A/CL5175.Contig2_RS259A/CL5532.Contig1_RS259A/CL5532.Contig2_RS259A/CL13310.Contig2_RS259A/CL13310.Contig3_RS259A/Unigene846_RS259A/Unigene1030_RS259A/Unigene17066_RS259A/Unigene38068_RS259A
GO:0051056	regulation of small GTPase mediated signal transduction	10/3096	12/11857	5.60715e-05	0.00340086	0.0032873	CL4918.Contig4_RS259A/CL5175.Contig2_RS259A/CL5532.Contig1_RS259A/CL5532.Contig2_RS259A/CL13310.Contig2_RS259A/CL13310.Contig3_RS259A/Unigene846_RS259A/Unigene1030_RS259A/Unigene17066_RS259A/Unigene38068_RS259A
GO:0006606	protein import into nucleus	30/3096	61/11857	9.14531e-05	0.00510308	0.00493269	CL858.Contig2_RS259A/CL1500.Contig1_RS259A/CL1500.Contig2_RS259A/CL4378.Contig2_RS259A/CL4378.Contig3_RS259A/CL4971.Contig2_RS259A/CL4971.Contig3_RS259A/CL4971.Contig6_RS259A/CL5366.Contig1_RS259A/CL10647.Contig2_RS259A/CL10998.Contig2_RS259A/CL10998.Contig3_RS259A/CL13910.Contig1_RS259A/CL13910.Contig2_RS259A/Unigene3812_RS259A/Unigene5808_RS259A/Unigene8701_RS259A/Unigene9412_RS259A/Unigene1189…
GO:0051170	import into nucleus	30/3096	61/11857	9.14531e-05	0.00510308	0.00493269	CL858.Contig2_RS259A/CL1500.Contig1_RS259A/CL1500.Contig2_RS259A/CL4378.Contig2_RS259A/CL4378.Contig3_RS259A/CL4971.Contig2_RS259A/CL4971.Contig3_RS259A/CL4971.Contig6_RS259A/CL5366.Contig1_RS259A/CL10647.Contig2_RS259A/CL10998.Contig2_RS259A/CL10998.Contig3_RS259A/CL13910.Contig1_RS259A/CL13910.Contig2_RS259A/Unigene3812_RS259A/Unigene5808_RS259A/Unigene8701_RS259A/Unigene9412_RS259A/Unigene1189…
GO:0009743	response to carbohydrate	12/3096	17/11857	0.000155705	0.00835419	0.00807524	CL323.Contig3_RS259A/CL2396.Contig1_RS259A/CL5707.Contig2_RS259A/CL8218.Contig2_RS259A/CL8830.Contig4_RS259A/CL9442.Contig2_RS259A/CL12453.Contig1_RS259A/Unigene12516_RS259A/Unigene19099_RS259A/Unigene22139_RS259A/Unigene28955_RS259A/Unigene29860_RS259A
GO:0009966	regulation of signal transduction	29/3096	60/11857	0.000175883	0.00876272	0.00847013	CL35.Contig5_RS259A/CL35.Contig10_RS259A/CL4642.Contig1_RS259A/CL4918.Contig4_RS259A/CL5175.Contig2_RS259A/CL5284.Contig1_RS259A/CL5532.Contig1_RS259A/CL5532.Contig2_RS259A/CL8218.Contig2_RS259A/CL9443.Contig2_RS259A/CL10626.Contig2_RS259A/CL13310.Contig2_RS259A/CL13310.Contig3_RS259A/CL13669.Contig3_RS259A/Unigene846_RS259A/Unigene1030_RS259A/Unigene1239_RS259A/Unigene6834_RS259A/Unigene7923_RS2…
GO:0010646	regulation of cell communication	29/3096	60/11857	0.000175883	0.00876272	0.00847013	CL35.Contig5_RS259A/CL35.Contig10_RS259A/CL4642.Contig1_RS259A/CL4918.Contig4_RS259A/CL5175.Contig2_RS259A/CL5284.Contig1_RS259A/CL5532.Contig1_RS259A/CL5532.Contig2_RS259A/CL8218.Contig2_RS259A/CL9443.Contig2_RS259A/CL10626.Contig2_RS259A/CL13310.Contig2_RS259A/CL13310.Contig3_RS259A/CL13669.Contig3_RS259A/Unigene846_RS259A/Unigene1030_RS259A/Unigene1239_RS259A/Unigene6834_RS259A/Unigene7923_RS2…
GO:0033365	protein localization to organelle	82/3096	221/11857	0.000186703	0.00898108	0.0086812	CL622.Contig1_RS259A/CL858.Contig2_RS259A/CL1358.Contig1_RS259A/CL1500.Contig1_RS259A/CL1500.Contig2_RS259A/CL1634.Contig2_RS259A/CL1634.Contig3_RS259A/CL1634.Contig4_RS259A/CL1669.Contig1_RS259A/CL1669.Contig2_RS259A/CL2225.Contig3_RS259A/CL2225.Contig8_RS259A/CL2225.Contig9_RS259A/CL2225.Contig11_RS259A/CL2443.Contig2_RS259A/CL2443.Contig3_RS259A/CL2807.Contig4_RS259A/CL3300.Contig3_RS259A/CL34…
GO:0030203	glycosaminoglycan metabolic process	12/3096	18/11857	0.00035595	0.0160676	0.0155311	CL2408.Contig3_RS259A/CL2408.Contig4_RS259A/CL2526.Contig1_RS259A/CL9541.Contig2_RS259A/CL9541.Contig3_RS259A/CL12750.Contig1_RS259A/CL12750.Contig3_RS259A/Unigene1287_RS259A/Unigene8101_RS259A/Unigene10798_RS259A/Unigene36545_RS259A/Unigene41117_RS259A
GO:0023051	regulation of signaling	29/3096	62/11857	0.000357058	0.0160676	0.0155311	CL35.Contig5_RS259A/CL35.Contig10_RS259A/CL4642.Contig1_RS259A/CL4918.Contig4_RS259A/CL5175.Contig2_RS259A/CL5284.Contig1_RS259A/CL5532.Contig1_RS259A/CL5532.Contig2_RS259A/CL8218.Contig2_RS259A/CL9443.Contig2_RS259A/CL10626.Contig2_RS259A/CL13310.Contig2_RS259A/CL13310.Contig3_RS259A/CL13669.Contig3_RS259A/Unigene846_RS259A/Unigene1030_RS259A/Unigene1239_RS259A/Unigene6834_RS259A/Unigene7923_RS2…
GO:0017038	protein import	42/3096	100/11857	0.000380386	0.0165825	0.0160288	CL622.Contig1_RS259A/CL858.Contig2_RS259A/CL1500.Contig1_RS259A/CL1500.Contig2_RS259A/CL3868.Contig4_RS259A/CL4085.Contig3_RS259A/CL4378.Contig2_RS259A/CL4378.Contig3_RS259A/CL4971.Contig2_RS259A/CL4971.Contig3_RS259A/CL4971.Contig6_RS259A/CL5366.Contig1_RS259A/CL7164.Contig1_RS259A/CL7345.Contig3_RS259A/CL10647.Contig2_RS259A/CL10871.Contig1_RS259A/CL10998.Contig2_RS259A/CL10998.Contig3_RS259A/C…
GO:0006913	nucleocytoplasmic transport	44/3096	107/11857	0.000485408	0.019916	0.019251	CL858.Contig2_RS259A/CL1500.Contig1_RS259A/CL1500.Contig2_RS259A/CL4378.Contig2_RS259A/CL4378.Contig3_RS259A/CL4622.Contig1_RS259A/CL4622.Contig3_RS259A/CL4971.Contig2_RS259A/CL4971.Contig3_RS259A/CL4971.Contig6_RS259A/CL5090.Contig2_RS259A/CL5366.Contig1_RS259A/CL10647.Contig2_RS259A/CL10998.Contig2_RS259A/CL10998.Contig3_RS259A/CL13910.Contig1_RS259A/CL13910.Contig2_RS259A/Unigene1118_RS259A/Un…
GO:0051169	nuclear transport	44/3096	107/11857	0.000485408	0.019916	0.019251	CL858.Contig2_RS259A/CL1500.Contig1_RS259A/CL1500.Contig2_RS259A/CL4378.Contig2_RS259A/CL4378.Contig3_RS259A/CL4622.Contig1_RS259A/CL4622.Contig3_RS259A/CL4971.Contig2_RS259A/CL4971.Contig3_RS259A/CL4971.Contig6_RS259A/CL5090.Contig2_RS259A/CL5366.Contig1_RS259A/CL10647.Contig2_RS259A/CL10998.Contig2_RS259A/CL10998.Contig3_RS259A/CL13910.Contig1_RS259A/CL13910.Contig2_RS259A/Unigene1118_RS259A/Un…
GO:1902531	regulation of intracellular signal transduction	17/3096	32/11857	0.00101046	0.040274	0.0389292	CL4642.Contig1_RS259A/CL4918.Contig4_RS259A/CL5175.Contig2_RS259A/CL5532.Contig1_RS259A/CL5532.Contig2_RS259A/CL10626.Contig2_RS259A/CL13310.Contig2_RS259A/CL13310.Contig3_RS259A/Unigene846_RS259A/Unigene1030_RS259A/Unigene1239_RS259A/Unigene7923_RS259A/Unigene11086_RS259A/Unigene14944_RS259A/Unigene17066_RS259A/Unigene38068_RS259A/Unigene43222_RS259A
GO:0006022	aminoglycan metabolic process	13/3096	22/11857	0.00108238	0.0408087	0.0394461	CL2408.Contig3_RS259A/CL2408.Contig4_RS259A/CL2526.Contig1_RS259A/CL3219.Contig3_RS259A/CL9541.Contig2_RS259A/CL9541.Contig3_RS259A/CL12750.Contig1_RS259A/CL12750.Contig3_RS259A/Unigene1287_RS259A/Unigene8101_RS259A/Unigene10798_RS259A/Unigene36545_RS259A/Unigene41117_RS259A
GO:0006536	glutamate metabolic process	13/3096	22/11857	0.00108238	0.0408087	0.0394461	CL908.Contig2_RS259A/CL2688.Contig3_RS259A/CL11597.Contig3_RS259A/Unigene1441_RS259A/Unigene1554_RS259A/Unigene6017_RS259A/Unigene24981_RS259A/Unigene29259_RS259A/Unigene29973_RS259A/Unigene34630_RS259A/Unigene38993_RS259A/Unigene42596_RS259A/Unigene44299_RS259A
GO:0030163	protein catabolic process	102/3096	300/11857	0.00130168	0.0477852	0.0461896	CL132.Contig1_RS259A/CL158.Contig1_RS259A/CL512.Contig2_RS259A/CL685.Contig2_RS259A/CL966.Contig1_RS259A/CL966.Contig3_RS259A/CL2098.Contig1_RS259A/CL2515.Contig3_RS259A/CL2599.Contig2_RS259A/CL2826.Contig1_RS259A/CL3031.Contig2_RS259A/CL3344.Contig3_RS259A/CL3651.Contig1_RS259A/CL3802.Contig1_RS259A/CL4023.Contig1_RS259A/CL4048.Contig1_RS259A/CL4048.Contig2_RS259A/CL4303.Contig1_RS259A/CL4668.Co…
Bold indicated genes enriched by

## Sheet: Enrichment by agriGO
Table S1. The enrichment of specific genes in A. nidus
GO term	Description	Number in input list	Number in BG/Ref	p-value	FDR
GO:0045184	establishment of protein localization	150	402	2.2e-07	0.00086
GO:0015031	protein transport	150	402	2.2e-07	0.00086
GO:0006886	intracellular protein transport	123	324	8.9e-07	0.00095
GO:0034613	cellular protein localization	129	343	8.8e-07	0.00095
GO:0051649	establishment of localization in cell	188	535	9.9e-07	0.00095
GO:0008104	protein localization	158	432	4.6e-07	0.00095
GO:0007154	cell communication	44	88	8.8e-07	0.00095
GO:0070727	cellular macromolecule localization	131	348	6.9e-07	0.00095
GO:0051641	cellular localization	201	579	1.1e-06	0.00097
GO:0023051	regulation of signaling process	29	53	6.4e-06	0.0038
GO:0009966	regulation of signal transduction	29	53	6.4e-06	0.0038
GO:0033036	macromolecule localization	182	528	5.5e-06	0.0038
GO:0010646	regulation of cell communication	29	53	6.4e-06	0.0038
GO:0046907	intracellular transport	173	500	7e-06	0.0038
GO:0006607	NLS-bearing substrate import into nucleus	21	34	9.6e-06	0.0049
GO:0000060	protein import into nucleus, translocation	16	23	1.3e-05	0.0057
GO:0006610	ribosomal protein import into nucleus	16	23	1.3e-05	0.0057
GO:0016192	vesicle-mediated transport	109	298	2.3e-05	0.0097
GO:0034504	protein localization in nucleus	34	70	3.2e-05	0.013
GO:0051056	regulation of small GTPase mediated signal transduction	10	12	4.8e-05	0.015
GO:0046578	regulation of Ras protein signal transduction	10	12	4.8e-05	0.015
GO:0032011	ARF protein signal transduction	10	12	4.8e-05	0.015
GO:0007265	Ras protein signal transduction	10	12	4.8e-05	0.015
GO:0032012	regulation of ARF protein signal transduction	10	12	4.8e-05	0.015
GO:0006605	protein targeting	73	190	7.8e-05	0.024
GO:0065003	macromolecular complex assembly	121	346	8.4e-05	0.025
GO:0000059	protein import into nucleus, docking	17	28	9.3e-05	0.026
GO:0034622	cellular macromolecular complex assembly	108	304	9.6e-05	0.026
GO:0048583	regulation of response to stimulus	31	65	0.00011	0.029
GO:0033365	protein localization in organelle	59	149	0.00014	0.035
GO:0008139	nuclear localization sequence binding	24	41	8.4e-06	0.023
GO:0005048	signal sequence binding	29	57	4e-05	0.043
GO:0005086	ARF guanyl-nucleotide exchange factor activity	10	12	4.8e-05	0.043
GO:0031965	nuclear membrane	21	32	2.3e-06	0.0022
GO:0031090	organelle membrane	269	815	2.6e-06	0.0022
GO:0005635	nuclear envelope	48	104	5.3e-06	0.0029
GO:0000502	proteasome complex	35	72	2.4e-05	0.0099
GO:0019867	outer membrane	25	46	3.2e-05	0.011
GO:0030529	ribonucleoprotein complex	259	812	5.4e-05	0.015
GO:0048500	signal recognition particle	13	19	0.00011	0.02
GO:0044425	membrane part	952	3315	0.00012	0.02
GO:0016021	integral to membrane	820	2830	0.0001	0.02
GO:0034399	nuclear periphery	17	28	9.3e-05	0.02
GO:0005794	Golgi apparatus	120	353	0.00033	0.046
GO:0031224	intrinsic to membrane	822	2867	0.00034	0.046
