# Supplementary material for: Transcriptomic Evidence of Adaptive Evolution of the Epiphytic Fern Asplenium nidus
Source: Int J Genomics. 2019 Dec 1;2019:1429316. doi: 10.1155/2019/1429316 (PMC6913284; doi:10.1155/2019/1429316)
Supplement: Supplementary 3 — Table S2: the functional annotation of specific genes in A. nidus. [file 1429316.f3.xlsx]

## Sheet: Sheet1
Table S2. The functional annotation enrichment of specific genes in A. nidus
Unigene ID	Gene description						GO term
	Nr	Nt	Swissprot	KEGG	COG	Interpro
CL35.Contig5_RS259A	gi|747018844|dbj|BAQ20609.1|/4.23007e-31/GRAS-family protein 1 [Lygodium japonicum]	NA	sp|Q8S4W7|GAI1_VITVI/2e-26/DELLA protein GAI1 OS=Vitis vinifera GN=GAI1 PE=2 SV=1	gmx:100814551/4e-30/DELLA protein SLR1-like; K14494 DELLA protein	NA	NA	biological_process:GO:0009938//negative regulation of gibberellic acid mediated signaling pathway;GO:0006355//regulation of transcription, DNA-templated;GO:0042538//hyperosmotic salinity response;GO:0009723//response to ethylene;GO:0009737//response to abscisic acid;GO:0009863//salicylic acid mediated signaling pathway;GO:0009867//jasmonic acid mediated signaling pathway;GO:0010187//negative regu…
CL35.Contig10_RS259A	gi|747018844|dbj|BAQ20609.1|/1.31128e-71/GRAS-family protein 1 [Lygodium japonicum]	gi|922534639|ref|XM_013743014.1|/1e-16/PREDICTED: Brassica oleracea var. oleracea DELLA protein RGA1 (LOC106306406), mRNA	sp|Q8S4W7|GAI1_VITVI/2e-53/DELLA protein GAI1 OS=Vitis vinifera GN=GAI1 PE=2 SV=1	ppp:PHYPADRAFT_235432/5e-66/GAL1; GAI1-like E3 ubiquitin ligase protein; K14494 DELLA protein	NA	PF03514/1.9E-64/GRAS domain family	biological_process:GO:0009938//negative regulation of gibberellic acid mediated signaling pathway;GO:0006355//regulation of transcription, DNA-templated;GO:0042538//hyperosmotic salinity response;GO:0009723//response to ethylene;GO:0009737//response to abscisic acid;GO:0009863//salicylic acid mediated signaling pathway;GO:0009867//jasmonic acid mediated signaling pathway;GO:0010187//negative regu…
CL799.Contig1_RS259A	gi|294461745|gb|ADE76431.1|/3.20055e-09/unknown [Picea sitchensis]	NA	NA	NA	NA	NA	biological_process:GO:0045739//positive regulation of DNA repair;cellular_component:GO:0070552//BRISC complex;GO:0070531//BRCA1-A complex;
CL1143.Contig5_RS259A	gi|225458428|ref|XP_002283731.1|/1.15699e-14/PREDICTED: mediator of RNA polymerase II transcription subunit 18 [Vitis vinifera] &gt;gi|731429374|ref|XP_010664634.1| PREDICTED: mediator of RNA polymerase II transcription subunit 18 [Vitis vinifera] &gt;gi|731429376|ref|XP_010664635.1| PREDICTED: mediator of RNA polymerase II transcription subunit 18 [Vitis vinifera] &gt;gi|302142417|emb|CBI19620.3…	NA	sp|Q9SJZ6|MED18_ARATH/9e-15/Mediator of RNA polymerase II transcription subunit 18 OS=Arabidopsis thaliana GN=MED18 PE=1 SV=1	vvi:100250557/2e-15/mediator of RNA polymerase II transcription subunit 18; K15135 mediator of RNA polymerase II transcription subunit 18	NA	NA	biological_process:GO:0045892//negative regulation of transcription, DNA-templated;GO:0048440//carpel development;GO:0048443//stamen development;GO:0048833//specification of floral organ number;GO:0006369//termination of RNA polymerase II transcription;GO:0006357//regulation of transcription from RNA polymerase II promoter;GO:0048510//regulation of timing of transition from vegetative to reproduc…
CL2853.Contig3_RS259A	gi|116779915|gb|ABK21476.1|/1.26387e-13/unknown [Picea sitchensis]	NA	sp|Q9MTQ6|RCCR_HORVU/8e-06/Red chlorophyll catabolite reductase (Fragment) OS=Hordeum vulgare GN=rccR PE=2 SV=1	atr:18421357/5e-10/red chlorophyll catabolite reductase; K13545 red chlorophyll catabolite reductase [EC:1.3.7.12]	NA	NA	biological_process:GO:0009814//defense response, incompatible interaction;GO:0015996//chlorophyll catabolic process;GO:0055114//oxidation-reduction process;GO:0010363//regulation of plant-type hypersensitive response;cellular_component:GO:0005829//cytosol;GO:0009941//chloroplast envelope;GO:0005739//mitochondrion;GO:0009570//chloroplast stroma;molecular_function:GO:0051743//red chlorophyll catabo…
CL3752.Contig2_RS259A	gi|302787485|ref|XP_002975512.1|/7.79788e-11/hypothetical protein SELMODRAFT_103907 [Selaginella moellendorffii] &gt;gi|302823764|ref|XP_002993531.1| hypothetical protein SELMODRAFT_137185 [Selaginella moellendorffii] &gt;gi|300138662|gb|EFJ05423.1| hypothetical protein SELMODRAFT_137185 [Selaginella moellendorffii] &gt;gi|300156513|gb|EFJ23141.1| hypothetical protein SELMODRAFT_103907 [Selaginel…	NA	NA	ath:AT1G32740/1e-09/SBP (S-ribonuclease binding protein) family protein; K19042 E3 ubiquitin-protein ligase BOI and related proteins [EC:2.3.2.27]	NA	NA	biological_process:GO:0016567//protein ubiquitination;GO:0031347//regulation of defense response;cellular_component:GO:0005634//nucleus;molecular_function:GO:0008270//zinc ion binding;GO:0004842//ubiquitin-protein transferase activity;
CL4380.Contig1_RS259A	gi|159485522|ref|XP_001700793.1|/5.11298e-30/hypothetical protein CHLREDRAFT_196299 [Chlamydomonas reinhardtii] &gt;gi|158281292|gb|EDP07047.1| predicted protein [Chlamydomonas reinhardtii]	NA	sp|Q9S814|EIN2_ARATH/4e-24/Ethylene-insensitive protein 2 OS=Arabidopsis thaliana GN=EIN2 PE=1 SV=1	gsl:Gasu_17660/1e-27/metal ion (Mn2+-iron) transporter, Nramp family; K03322 manganese transport protein	mlr2501/2e-27/---	PF01566/3.4E-29/Natural resistance-associated macrophage protein	biological_process:GO:0050794//regulation of cellular process;GO:0006810//transport;GO:0051716//cellular response to stimulus;GO:0009653//anatomical structure morphogenesis;GO:0006970//response to osmotic stress;GO:0009888//tissue development;GO:0048731//system development;GO:0048583//regulation of response to stimulus;GO:0044763//single-organism cellular process;GO:0098542//defense response to o…
CL4642.Contig1_RS259A	gi|641831451|gb|KDO50509.1|/6.17688e-09/hypothetical protein CISIN_1g004636mg [Citrus sinensis]	NA	sp|O48929|ETR1_TOBAC/2e-09/Ethylene receptor OS=Nicotiana tabacum GN=ETR1 PE=2 SV=1	cit:102578063/1e-09/ETR1, ETR-1; ethylene response 1; K14509 ethylene receptor [EC:2.7.13.-]	NA	NA	biological_process:GO:0010105//negative regulation of ethylene-activated signaling pathway;GO:0023014//signal transduction by protein phosphorylation;GO:0018106//peptidyl-histidine phosphorylation;cellular_component:GO:0016021//integral component of membrane;GO:0005789//endoplasmic reticulum membrane;molecular_function:GO:0051740//ethylene binding;GO:0038199//ethylene receptor activity;GO:0000155…
CL4918.Contig4_RS259A	gi|985442890|ref|XP_015384495.1|/1.22833e-40/PREDICTED: brefeldin A-inhibited guanine nucleotide-exchange protein 5 isoform X2 [Citrus sinensis]	gi|729435755|ref|XM_010522208.1|/6e-11/PREDICTED: Tarenaya hassleriana brefeldin A-inhibited guanine nucleotide-exchange protein 5-like (LOC104799601), mRNA	sp|F4IXW2|BIG5_ARATH/7e-42/Brefeldin A-inhibited guanine nucleotide-exchange protein 5 OS=Arabidopsis thaliana GN=BIG5 PE=1 SV=2	tcc:TCM_037433/2e-41/HOPM interactor 7 isoform 1; K13462 guanine nucleotide-exchange factor	SPAC30.01c/2e-16/---	PTHR10663/1.8E-64/--	biological_process:GO:0032012//regulation of ARF protein signal transduction;GO:0043547//positive regulation of GTPase activity;molecular_function:GO:0005086//ARF guanyl-nucleotide exchange factor activity;
CL5175.Contig2_RS259A	gi|168003036|ref|XP_001754219.1|/1.73944e-23/predicted protein [Physcomitrella patens] &gt;gi|162694773|gb|EDQ81120.1| predicted protein [Physcomitrella patens]	NA	sp|Q9FLY5|GNL1_ARATH/9e-23/ARF guanine-nucleotide exchange factor GNL1 OS=Arabidopsis thaliana GN=GNL1 PE=3 SV=1	nnu:104612314/8e-24/ARF guanine-nucleotide exchange factor GNOM-like; K18443 golgi-specific brefeldin A-resistance guanine nucleotide exchange factor 1	NA	PTHR10663/1.1E-31/--	biological_process:GO:0032012//regulation of ARF protein signal transduction;GO:0043547//positive regulation of GTPase activity;GO:0016192//vesicle-mediated transport;cellular_component:GO:0005802//trans-Golgi network;molecular_function:GO:0005086//ARF guanyl-nucleotide exchange factor activity;
CL5284.Contig1_RS259A	gi|747018844|dbj|BAQ20609.1|/1.02661e-29/GRAS-family protein 1 [Lygodium japonicum]	gi|719993532|ref|XM_010255608.1|/7e-08/PREDICTED: Nelumbo nucifera ethylene-insensitive protein 2-like (LOC104595047), transcript variant X1, mRNA	sp|Q8S4W7|GAI1_VITVI/3e-25/DELLA protein GAI1 OS=Vitis vinifera GN=GAI1 PE=2 SV=1	gmx:100814551/8e-29/DELLA protein SLR1-like; K14494 DELLA protein	NA	NA	biological_process:GO:0009938//negative regulation of gibberellic acid mediated signaling pathway;GO:0006355//regulation of transcription, DNA-templated;GO:0042538//hyperosmotic salinity response;GO:0009723//response to ethylene;GO:0009737//response to abscisic acid;GO:0009863//salicylic acid mediated signaling pathway;GO:0009867//jasmonic acid mediated signaling pathway;GO:0010187//negative regu…
CL5532.Contig1_RS259A	gi|168002293|ref|XP_001753848.1|/4.58852e-48/predicted protein [Physcomitrella patens] &gt;gi|162694824|gb|EDQ81170.1| predicted protein [Physcomitrella patens]	NA	sp|Q9LZX8|BIG2_ARATH/5e-34/Brefeldin A-inhibited guanine nucleotide-exchange protein 2 OS=Arabidopsis thaliana GN=BIG2 PE=2 SV=1	osa:4332241/1e-43/brefeldin A-inhibited guanine nucleotide-exchange protein 2; K18442 brefeldin A-inhibited guanine nucleotide-exchange protein	NA	PTHR10663/2.7E-42/--	biological_process:GO:0032012//regulation of ARF protein signal transduction;GO:0043547//positive regulation of GTPase activity;GO:0016192//vesicle-mediated transport;cellular_component:GO:0005802//trans-Golgi network;molecular_function:GO:0005086//ARF guanyl-nucleotide exchange factor activity;
CL5532.Contig2_RS259A	gi|168054674|ref|XP_001779755.1|/0/predicted protein [Physcomitrella patens] &gt;gi|162668840|gb|EDQ55439.1| predicted protein [Physcomitrella patens]	gi|698434532|ref|XM_009800792.1|/1e-13/PREDICTED: Nicotiana sylvestris brefeldin A-inhibited guanine nucleotide-exchange protein 2-like (LOC104245214), mRNA	sp|Q9LZX8|BIG2_ARATH/0.0/Brefeldin A-inhibited guanine nucleotide-exchange protein 2 OS=Arabidopsis thaliana GN=BIG2 PE=2 SV=1	obr:102704683/0.0/brefeldin A-inhibited guanine nucleotide-exchange protein 2; K18442 brefeldin A-inhibited guanine nucleotide-exchange protein	SPAC4D7.01c/1e-36/---	PTHR10663:SF42/5.5E-192/--	biological_process:GO:0032012//regulation of ARF protein signal transduction;GO:0043547//positive regulation of GTPase activity;GO:0016192//vesicle-mediated transport;cellular_component:GO:0005802//trans-Golgi network;molecular_function:GO:0005086//ARF guanyl-nucleotide exchange factor activity;
CL5932.Contig1_RS259A	gi|302769988|ref|XP_002968413.1|/6.74092e-37/hypothetical protein SELMODRAFT_270691 [Selaginella moellendorffii] &gt;gi|300164057|gb|EFJ30667.1| hypothetical protein SELMODRAFT_270691 [Selaginella moellendorffii]	NA	sp|Q02073|CH10C_SPIOL/1e-34/20 kDa chaperonin, chloroplastic OS=Spinacia oleracea GN=CPN21 PE=2 SV=1	vvi:100232962/6e-37/CPN21; 20 kDa chaperonin, chloroplastic; K04078 chaperonin GroES	slr2075/3e-21/---	PR00297/1.9E-24/10kDa chaperonin signature	biological_process:GO:0006986//response to unfolded protein;GO:0051085//chaperone mediated protein folding requiring cofactor;GO:1901671//positive regulation of superoxide dismutase activity;cellular_component:GO:0005759//mitochondrial matrix;GO:0009507//chloroplast;molecular_function:GO:0005524//ATP binding;GO:0046914//transition metal ion binding;GO:0051087//chaperone binding;GO:0051082//unfold…
CL6972.Contig1_RS259A	gi|514708123|ref|XP_004951463.1|/5.3488e-52/PREDICTED: glycine-rich RNA-binding protein 3, mitochondrial-like [Setaria italica]	NA	sp|Q9FNR1|RBG3_ARATH/7e-33/Glycine-rich RNA-binding protein 3, mitochondrial OS=Arabidopsis thaliana GN=RBG3 PE=2 SV=1	sita:101770183/9e-53/glycine-rich RNA-binding protein 3, mitochondrial-like; K12741 heterogeneous nuclear ribonucleoprotein A1/A3	XF0818/1e-19/---	NA	biological_process:GO:0048584//positive regulation of response to stimulus;GO:0048582//positive regulation of post-embryonic development;GO:2000028//regulation of photoperiodism, flowering;GO:2000243//positive regulation of reproductive process;molecular_function:GO:0003723//RNA binding;
CL8218.Contig2_RS259A	gi|794540381|gb|AKA58772.1|/1.76572e-53/heterotrimeric G-protein alpha subunit 1 [Picea abies]	gi|157674592|gb|EU142021.1|/2e-12/Phaseolus vulgaris hetrotrimeric G protein alpha subunit (HG2) mRNA, complete cds	sp|P18064|GPA1_ARATH/2e-52/Guanine nucleotide-binding protein alpha-1 subunit OS=Arabidopsis thaliana GN=GPA1 PE=1 SV=1	tcc:TCM_037402/7e-52/G protein alpha subunit 1, ALPHA 1,ATGPA1 isoform 1; K19729 guanine nucleotide-binding protein G(t) subunit alpha 3	NA	PTHR10218/3.4E-44/--	biological_process:GO:0006571//tyrosine biosynthetic process;GO:0042127//regulation of cell proliferation;GO:0009785//blue light signaling pathway;GO:0010244//response to low fluence blue light stimulus by blue low-fluence system;GO:0009749//response to glucose;GO:0009788//negative regulation of abscisic acid-activated signaling pathway;GO:0010027//thylakoid membrane organization;GO:0009740//gibb…
CL9443.Contig2_RS259A	gi|672121507|ref|XP_008784054.1|/7.71402e-37/PREDICTED: nicalin-like [Phoenix dactylifera]	NA	NA	NA	NA	PTHR31826:SF0/7.8E-27/--	biological_process:GO:0009966//regulation of signal transduction;cellular_component:GO:0005789//endoplasmic reticulum membrane;
CL9878.Contig2_RS259A	gi|126723800|gb|ABO26814.1|/3.05786e-07/SOBER1-like protein [Arabidopsis thaliana]	gi|147836158|emb|AM486515.2|/6e-07/Vitis vinifera contig VV78X185863.2, whole genome shotgun sequence	NA	vvi:100854352/2e-07/uncharacterized LOC100854352; K06130 lysophospholipase II [EC:3.1.1.5]	NA	NA	biological_process:GO:0009814//defense response, incompatible interaction;GO:0002084//protein depalmitoylation;GO:0010363//regulation of plant-type hypersensitive response;cellular_component:GO:0005886//plasma membrane;GO:0005737//cytoplasm;molecular_function:GO:0008474//palmitoyl-(protein) hydrolase activity;GO:0052689//carboxylic ester hydrolase activity;
CL10626.Contig2_RS259A	gi|350538283|ref|NP_001234591.1|/3.0387e-51/MAPKK [Solanum lycopersicum] &gt;gi|970014451|ref|XP_015068215.1| PREDICTED: mitogen-activated protein kinase kinase 6 [Solanum pennellii] &gt;gi|51471930|gb|AAU04435.1| MAPKK [Solanum lycopersicum]	gi|731354007|ref|XM_010690050.1|/3e-11/PREDICTED: Beta vulgaris subsp. vulgaris mitogen-activated protein kinase kinase 6 (LOC104902319), mRNA	sp|Q9FJV0|M2K6_ARATH/2e-47/Mitogen-activated protein kinase kinase 6 OS=Arabidopsis thaliana GN=MKK6 PE=1 SV=1	spen:107012802/6e-52/mitogen-activated protein kinase kinase 6; K04368 mitogen-activated protein kinase kinase 1 [EC:2.7.12.2]	NA	PF00069/5.2E-8/Protein kinase domain	biological_process:GO:0000187//activation of MAPK activity;GO:0010311//lateral root formation;GO:0007112//male meiosis cytokinesis;cellular_component:GO:0009524//phragmoplast;molecular_function:GO:0005524//ATP binding;GO:0005515//protein binding;GO:0004708//MAP kinase kinase activity;GO:0004702//receptor signaling protein serine/threonine kinase activity;
CL10776.Contig5_RS259A	gi|743867604|ref|XP_010905359.1|/1.91655e-14/PREDICTED: coronatine-insensitive protein 1-like [Elaeis guineensis] &gt;gi|743867608|ref|XP_010905360.1| PREDICTED: coronatine-insensitive protein 1-like [Elaeis guineensis]	NA	sp|O04197|COI1_ARATH/4e-15/Coronatine-insensitive protein 1 OS=Arabidopsis thaliana GN=COI1 PE=1 SV=1	egu:105032583/3e-15/coronatine-insensitive protein 1-like; K13463 coronatine-insensitive protein 1	NA	NA	biological_process:GO:0050832//defense response to fungus;GO:0009901//anther dehiscence;GO:0010118//stomatal movement;GO:0009861//jasmonic acid and ethylene-dependent systemic resistance;GO:0009909//regulation of flower development;GO:0031146//SCF-dependent proteasomal ubiquitin-dependent protein catabolic process;GO:0042742//defense response to bacterium;GO:0009641//shade avoidance;GO:0009867//j…
CL11972.Contig2_RS259A	gi|168026312|ref|XP_001765676.1|/3.49077e-08/predicted protein [Physcomitrella patens] &gt;gi|162683102|gb|EDQ69515.1| predicted protein [Physcomitrella patens]	NA	NA	mdm:103424607/9e-07/pre-mRNA-splicing factor SPF27 homolog; K12861 pre-mRNA-splicing factor SPF27	NA	NA	biological_process:GO:0050832//defense response to fungus;GO:0010204//defense response signaling pathway, resistance gene-independent;GO:0000398//mRNA splicing, via spliceosome;GO:0009870//defense response signaling pathway, resistance gene-dependent;GO:0042742//defense response to bacterium;cellular_component:GO:0071012//catalytic step 1 spliceosome;GO:0000974//Prp19 complex;GO:0071013//catalyti…
CL12209.Contig1_RS259A	gi|148906666|gb|ABR16482.1|/1.68666e-74/unknown [Picea sitchensis]	NA	sp|I1SSI5|MAX2A_PETHY/4e-73/F-box/LRR-repeat MAX2 homolog A OS=Petunia hybrida GN=MAX2A PE=1 SV=1	vra:106769838/2e-06/F-box/LRR-repeat protein 4; K10268 F-box and leucine-rich repeat protein 2/20	NA	SM00367/0.047/Leucine-rich repeat - CC (cysteine-containing) subfamily	biological_process:GO:0042335//cuticle development;GO:0010016//shoot system morphogenesis;GO:1902584//positive regulation of response to water deprivation;GO:0009416//response to light stimulus;GO:0009926//auxin polar transport;GO:0010187//negative regulation of seed germination;GO:0009934//regulation of meristem structural organization;cellular_component:GO:0005634//nucleus;
CL12221.Contig2_RS259A	gi|719982804|ref|XP_010250569.1|/4.51387e-19/PREDICTED: uncharacterized protein LOC104592783 [Nelumbo nucifera]	NA	NA	nnu:104592783/7e-20/uncharacterized LOC104592783; K19363 lipopolysaccharide-induced tumor necrosis factor-alpha factor	NA	NA	biological_process:GO:0034051//negative regulation of plant-type hypersensitive response;cellular_component:GO:0005886//plasma membrane;
CL12237.Contig2_RS259A	gi|302772252|ref|XP_002969544.1|/2.98219e-49/hypothetical protein SELMODRAFT_170698 [Selaginella moellendorffii] &gt;gi|300163020|gb|EFJ29632.1| hypothetical protein SELMODRAFT_170698 [Selaginella moellendorffii]	gi|695023104|ref|XM_009400428.1|/2e-39/PREDICTED: Musa acuminata subsp. malaccensis protein XAP5 CIRCADIAN TIMEKEEPER (LOC103983222), transcript variant X2, mRNA	sp|Q69JZ7|XCT_ORYSJ/1e-45/Protein XAP5 CIRCADIAN TIMEKEEPER OS=Oryza sativa subsp. japonica GN=XCT PE=2 SV=1	sind:105169712/6e-49/protein XAP5 CIRCADIAN TIMEKEEPER; K13119 protein FAM50	NA	NA	biological_process:GO:0042752//regulation of circadian rhythm;GO:0009873//ethylene-activated signaling pathway;GO:0009637//response to blue light;GO:0010114//response to red light;GO:0010099//regulation of photomorphogenesis;cellular_component:GO:0005634//nucleus;
CL13310.Contig2_RS259A	gi|302784999|ref|XP_002974271.1|/2.17189e-29/hypothetical protein SELMODRAFT_101122 [Selaginella moellendorffii] &gt;gi|300157869|gb|EFJ24493.1| hypothetical protein SELMODRAFT_101122 [Selaginella moellendorffii]	NA	sp|Q42510|GNOM_ARATH/2e-19/ARF guanine-nucleotide exchange factor GNOM OS=Arabidopsis thaliana GN=GN PE=1 SV=1	nnu:104612314/2e-24/ARF guanine-nucleotide exchange factor GNOM-like; K18443 golgi-specific brefeldin A-resistance guanine nucleotide exchange factor 1	NA	PTHR10663:SF131/2.8E-32/--	biological_process:GO:0032012//regulation of ARF protein signal transduction;GO:0043547//positive regulation of GTPase activity;molecular_function:GO:0005086//ARF guanyl-nucleotide exchange factor activity;
CL13310.Contig3_RS259A	gi|302784999|ref|XP_002974271.1|/2.63846e-43/hypothetical protein SELMODRAFT_101122 [Selaginella moellendorffii] &gt;gi|300157869|gb|EFJ24493.1| hypothetical protein SELMODRAFT_101122 [Selaginella moellendorffii]	gi|769817819|ref|XM_006838843.2|/1e-17/PREDICTED: Amborella trichopoda ARF guanine-nucleotide exchange factor GNOM (LOC18429558), mRNA	sp|Q42510|GNOM_ARATH/5e-43/ARF guanine-nucleotide exchange factor GNOM OS=Arabidopsis thaliana GN=GN PE=1 SV=1	mus:103986838/1e-42/ARF guanine-nucleotide exchange factor GNOM-like; K18443 golgi-specific brefeldin A-resistance guanine nucleotide exchange factor 1	SPAC4D7.01c/2e-06/---	PF01369/2.2E-14/Sec7 domain	biological_process:GO:0032012//regulation of ARF protein signal transduction;GO:0043547//positive regulation of GTPase activity;molecular_function:GO:0005086//ARF guanyl-nucleotide exchange factor activity;
CL13669.Contig3_RS259A	gi|720067012|ref|XP_010276682.1|/2.20864e-58/PREDICTED: E3 ubiquitin-protein ligase KEG isoform X2 [Nelumbo nucifera]	gi|720067011|ref|XM_010278380.1|/3e-07/PREDICTED: Nelumbo nucifera E3 ubiquitin-protein ligase KEG (LOC104611359), transcript variant X2, mRNA	sp|Q9FY48|KEG_ARATH/2e-55/E3 ubiquitin-protein ligase KEG OS=Arabidopsis thaliana GN=KEG PE=1 SV=2	nnu:104611359/3e-59/E3 ubiquitin-protein ligase KEG; K16279 E3 ubiquitin-protein ligase KEG [EC:2.7.11.1 2.3.2.27]	NA	NA	biological_process:GO:0016567//protein ubiquitination;GO:0006468//protein phosphorylation;GO:0032940//secretion by cell;GO:0045324//late endosome to vacuole transport;GO:0006952//defense response;GO:0048589//developmental growth;GO:0009788//negative regulation of abscisic acid-activated signaling pathway;cellular_component:GO:0005802//trans-Golgi network;GO:0005769//early endosome;molecular_funct…
CL14274.Contig2_RS259A	gi|901801284|gb|KMZ61273.1|/2.51995e-54/Mediator of RNA polymerase II transcription subunit 16 [Zostera marina]	NA	sp|F4JGZ1|MED16_ARATH/2e-52/Mediator of RNA polymerase II transcription subunit 16 OS=Arabidopsis thaliana GN=MED16 PE=1 SV=1	NA	NA	NA	biological_process:GO:0050794//regulation of cellular process;GO:0044699//single-organism process;GO:0048583//regulation of response to stimulus;
CL14424.Contig1_RS259A	gi|566185972|ref|XP_006378996.1|/1.57268e-75/hypothetical protein POPTR_0009s02660g [Populus trichocarpa] &gt;gi|550330898|gb|ERP56793.1| hypothetical protein POPTR_0009s02660g [Populus trichocarpa]	gi|659667827|ref|NM_001294152.1|/1e-115/Zea mays calmodulin (CaM1), mRNA	sp|Q03509|CALM6_ARATH/2e-76/Calmodulin-6 OS=Arabidopsis thaliana GN=CAM6 PE=1 SV=2	vvi:100261610/2e-75/calmodulin-7; K02183 calmodulin	SPAC3A12.14/5e-56/---	SM00054/3.2E-8/EF-hand, calcium binding motif	biological_process:GO:0010099//regulation of photomorphogenesis;molecular_function:GO:0005509//calcium ion binding;
Unigene417_RS259A	gi|823228083|ref|XP_012446815.1|/7.46181e-45/PREDICTED: probable protein phosphatase 2C 22 isoform X1 [Gossypium raimondii] &gt;gi|763786913|gb|KJB53909.1| hypothetical protein B456_009G010900 [Gossypium raimondii]	gi|195619421|gb|EU959423.1|/8e-06/Zea mays clone 218118 mRNA sequence	sp|Q9SD02|P2C47_ARATH/9e-42/Probable protein phosphatase 2C 47 OS=Arabidopsis thaliana GN=At3g51470 PE=1 SV=1	gra:105770249/1e-45/probable protein phosphatase 2C 22; K14803 protein phosphatase PTC2/3 [EC:3.1.3.16]	SPCC4F11.02/6e-11/---	NA	biological_process:GO:0050688//regulation of defense response to virus;GO:0006470//protein dephosphorylation;cellular_component:GO:0005634//nucleus;GO:0005829//cytosol;molecular_function:GO:0046872//metal ion binding;GO:0004722//protein serine/threonine phosphatase activity;
Unigene846_RS259A	gi|302784092|ref|XP_002973818.1|/3.58869e-37/hypothetical protein SELMODRAFT_173646 [Selaginella moellendorffii] &gt;gi|300158150|gb|EFJ24773.1| hypothetical protein SELMODRAFT_173646 [Selaginella moellendorffii]	gi|747090966|ref|XM_011094894.1|/3e-09/PREDICTED: Sesamum indicum brefeldin A-inhibited guanine nucleotide-exchange protein 2 (LOC105173217), mRNA	sp|Q9LZX8|BIG2_ARATH/2e-33/Brefeldin A-inhibited guanine nucleotide-exchange protein 2 OS=Arabidopsis thaliana GN=BIG2 PE=2 SV=1	vvi:100250634/5e-34/brefeldin A-inhibited guanine nucleotide-exchange protein 2-like; K18442 brefeldin A-inhibited guanine nucleotide-exchange protein	NA	PTHR10663/6.4E-27/--	biological_process:GO:0032012//regulation of ARF protein signal transduction;GO:0043547//positive regulation of GTPase activity;GO:0016192//vesicle-mediated transport;cellular_component:GO:0005802//trans-Golgi network;molecular_function:GO:0005086//ARF guanyl-nucleotide exchange factor activity;
Unigene1030_RS259A	gi|586677357|ref|XP_006838906.1|/3.22736e-41/PREDICTED: ARF guanine-nucleotide exchange factor GNOM [Amborella trichopoda] &gt;gi|548841412|gb|ERN01475.1| hypothetical protein AMTR_s00002p00269600 [Amborella trichopoda]	NA	sp|Q42510|GNOM_ARATH/2e-41/ARF guanine-nucleotide exchange factor GNOM OS=Arabidopsis thaliana GN=GN PE=1 SV=1	atr:18429558/5e-42/ARF guanine-nucleotide exchange factor GNOM; K18443 golgi-specific brefeldin A-resistance guanine nucleotide exchange factor 1	SPBC211.03c/4e-13/---	PTHR10663/2.3E-62/--	biological_process:GO:0032012//regulation of ARF protein signal transduction;GO:0043547//positive regulation of GTPase activity;molecular_function:GO:0005086//ARF guanyl-nucleotide exchange factor activity;
Unigene1239_RS259A	gi|944242472|gb|KQL06780.1|/6.52352e-10/hypothetical protein SETIT_002024mg [Setaria italica]	NA	sp|Q5QN75|M2K1_ORYSJ/5e-11/Mitogen-activated protein kinase kinase 1 OS=Oryza sativa subsp. japonica GN=MKK1 PE=1 SV=1	sita:101777602/1e-10/mitogen-activated protein kinase kinase 1-like; K04368 mitogen-activated protein kinase kinase 1 [EC:2.7.12.2]	NA	NA	biological_process:GO:0007112//male meiosis cytokinesis;GO:0000187//activation of MAPK activity;GO:0010311//lateral root formation;cellular_component:GO:0009524//phragmoplast;molecular_function:GO:0005524//ATP binding;GO:0004708//MAP kinase kinase activity;GO:0004702//receptor signaling protein serine/threonine kinase activity;
Unigene6834_RS259A	gi|672177456|ref|XP_008808824.1|/8.29194e-137/PREDICTED: probable UDP-N-acetylglucosamine--peptide N-acetylglucosaminyltransferase SPINDLY isoform X3 [Phoenix dactylifera]	gi|719974786|ref|XM_010247534.1|/3e-46/PREDICTED: Nelumbo nucifera probable UDP-N-acetylglucosamine--peptide N-acetylglucosaminyltransferase SPINDLY (LOC104589264), transcript variant X2, mRNA	sp|O82039|SPY_PETHY/5e-135/Probable UDP-N-acetylglucosamine--peptide N-acetylglucosaminyltransferase SPINDLY OS=Petunia hybrida GN=SPY PE=2 SV=1	obr:102717126/4e-28/probable UDP-N-acetylglucosamine--peptide N-acetylglucosaminyltransferase SEC; K09667 protein O-GlcNAc transferase [EC:2.4.1.255]	MTH72/2e-23/---	PF13414/9.4E-13/TPR repeat	biological_process:GO:0009736//cytokinin-activated signaling pathway;GO:0009938//negative regulation of gibberellic acid mediated signaling pathway;GO:2000377//regulation of reactive oxygen species metabolic process;cellular_component:GO:0005634//nucleus;GO:0005829//cytosol;molecular_function:GO:0016757//transferase activity, transferring glycosyl groups;
Unigene7030_RS259A	gi|573920956|ref|XP_006648073.1|/9.22713e-12/PREDICTED: proliferating cell nuclear antigen-like [Oryza brachyantha]	gi|743790390|ref|XM_010924852.1|/4e-11/PREDICTED: Elaeis guineensis proliferating cell nuclear antigen (LOC105046296), mRNA	sp|P17070|PCNA_ORYSJ/2e-13/Proliferating cell nuclear antigen OS=Oryza sativa subsp. japonica GN=Os02g0805200 PE=2 SV=2	obr:102706724/2e-12/proliferating cell nuclear antigen; K04802 proliferating cell nuclear antigen	SPBC16D10.09/4e-08/---	PF00705/1.2E-14/Proliferating cell nuclear antigen, N-terminal domain	biological_process:GO:0006272//leading strand elongation;GO:0006298//mismatch repair;GO:0045740//positive regulation of DNA replication;GO:0034644//cellular response to UV;GO:0019985//translesion synthesis;GO:0045739//positive regulation of DNA repair;cellular_component:GO:0005634//nucleus;GO:0043626//PCNA complex;molecular_function:GO:0030337//DNA polymerase processivity factor activity;GO:00036…
Unigene7923_RS259A	gi|902176699|gb|KNA08824.1|/1.91131e-08/hypothetical protein SOVF_159250 isoform B [Spinacia oleracea]	gi|848871814|ref|XM_012981015.1|/6e-09/PREDICTED: Erythranthe guttatus ethylene receptor 1 (LOC105957099), mRNA	sp|O48929|ETR1_TOBAC/3e-09/Ethylene receptor OS=Nicotiana tabacum GN=ETR1 PE=2 SV=1	ppp:PHYPADRAFT_209543/3e-08/ETR3; ETR3 ethylene receptor protein; K14509 ethylene receptor [EC:2.7.13.-]	NA	NA	biological_process:GO:0010105//negative regulation of ethylene-activated signaling pathway;GO:0023014//signal transduction by protein phosphorylation;GO:0018106//peptidyl-histidine phosphorylation;cellular_component:GO:0016021//integral component of membrane;GO:0005789//endoplasmic reticulum membrane;molecular_function:GO:0051740//ethylene binding;GO:0038199//ethylene receptor activity;GO:0000155…
Unigene11086_RS259A	gi|22095687|sp|Q9ZWL6.1|ETR1_PASED/2.56516e-59/RecName: Full=Ethylene receptor; AltName: Full=PE-ETR1 &gt;gi|4164159|dbj|BAA37136.1| ethylene receptor [Passiflora edulis]	gi|302783904|ref|XM_002973679.1|/1e-31/Selaginella moellendorffii two-component response regulator (ETR3), mRNA	sp|Q9ZWL6|ETR1_PASED/3e-61/Ethylene receptor OS=Passiflora edulis GN=ETR1 PE=2 SV=1	ppp:PHYPADRAFT_209543/9e-60/ETR3; ETR3 ethylene receptor protein; K14509 ethylene receptor [EC:2.7.13.-]	NA	PTHR24423/2.0E-91/--	biological_process:GO:0010105//negative regulation of ethylene-activated signaling pathway;GO:0023014//signal transduction by protein phosphorylation;GO:0018106//peptidyl-histidine phosphorylation;cellular_component:GO:0016021//integral component of membrane;GO:0005789//endoplasmic reticulum membrane;molecular_function:GO:0051740//ethylene binding;GO:0005524//ATP binding;GO:0038199//ethylene rece…
Unigene14944_RS259A	gi|22095686|sp|Q9XH58.1|ETR1_PELHO/1.19992e-14/RecName: Full=Ethylene receptor 1; AltName: Full=PhETR1 &gt;gi|5006604|gb|AAD37576.1|AF141928_1 ethylene receptor homolog [Pelargonium x hortorum]	gi|33337790|gb|AF113747.1|/1e-06/Musa acuminata AAA Group clone pBER10 ethylene receptor-like protein mRNA, complete cds	sp|Q9XH58|ETR1_PELHO/2e-16/Ethylene receptor 1 OS=Pelargonium hortorum GN=ETR1 PE=2 SV=1	mtr:MTR_4g031150/3e-14/hybrid sensory histidine kinase; K14509 ethylene receptor [EC:2.7.13.-]	NA	NA	biological_process:GO:0010105//negative regulation of ethylene-activated signaling pathway;GO:0023014//signal transduction by protein phosphorylation;GO:0018106//peptidyl-histidine phosphorylation;cellular_component:GO:0016021//integral component of membrane;GO:0005789//endoplasmic reticulum membrane;molecular_function:GO:0051740//ethylene binding;GO:0005524//ATP binding;GO:0038199//ethylene rece…
Unigene17061_RS259A	gi|951062893|ref|XP_014523157.1|/2.73518e-42/PREDICTED: nuclear pore complex protein NUP98A [Vigna radiata var. radiata]	NA	sp|Q9T076|ENL2_ARATH/2e-06/Early nodulin-like protein 2 OS=Arabidopsis thaliana GN=At4g27520 PE=1 SV=1	vra:106779552/5e-43/nuclear pore complex protein NUP98A; K14297 nuclear pore complex protein Nup98-Nup96	YIL115c/3e-09/---	PF12815/1.7E-7/Spt5 C-terminal nonapeptide repeat binding Spt4	biological_process:GO:0006406//mRNA export from nucleus;GO:1902446//regulation of shade avoidance;cellular_component:GO:0031965//nuclear membrane;GO:0005737//cytoplasm;molecular_function:GO:0005515//protein binding;
Unigene17066_RS259A	gi|255562960|ref|XP_002522485.1|/1.93181e-41/PREDICTED: ARF guanine-nucleotide exchange factor GNOM [Ricinus communis] &gt;gi|223538370|gb|EEF39977.1| pattern formation protein, putative [Ricinus communis]	gi|848855125|ref|XM_012995732.1|/2e-08/PREDICTED: Erythranthe guttatus ARF guanine-nucleotide exchange factor GNOM-like (LOC105970904), transcript variant X2, mRNA	sp|Q42510|GNOM_ARATH/1e-39/ARF guanine-nucleotide exchange factor GNOM OS=Arabidopsis thaliana GN=GN PE=1 SV=1	rcu:8281853/4e-42/ARF guanine-nucleotide exchange factor GNOM; K18443 golgi-specific brefeldin A-resistance guanine nucleotide exchange factor 1	NA	PTHR10663:SF131/5.4E-61/--	biological_process:GO:0032012//regulation of ARF protein signal transduction;GO:0043547//positive regulation of GTPase activity;molecular_function:GO:0005086//ARF guanyl-nucleotide exchange factor activity;
Unigene18772_RS259A	gi|302807925|ref|XP_002985656.1|/7.19145e-18/hypothetical protein SELMODRAFT_122882, partial [Selaginella moellendorffii] &gt;gi|300146565|gb|EFJ13234.1| hypothetical protein SELMODRAFT_122882, partial [Selaginella moellendorffii]	NA	sp|O65282|CH10C_ARATH/1e-13/20 kDa chaperonin, chloroplastic OS=Arabidopsis thaliana GN=CPN21 PE=1 SV=2	cam:101490851/4e-15/20 kDa chaperonin, chloroplastic-like; K04078 chaperonin GroES	Rv3418c/3e-09/---	NA	biological_process:GO:0006986//response to unfolded protein;GO:0051085//chaperone mediated protein folding requiring cofactor;GO:1901671//positive regulation of superoxide dismutase activity;cellular_component:GO:0005759//mitochondrial matrix;GO:0009507//chloroplast;molecular_function:GO:0005524//ATP binding;GO:0046914//transition metal ion binding;GO:0051087//chaperone binding;GO:0051082//unfold…
Unigene19092_RS259A	gi|302816693|ref|XP_002990025.1|/5.95944e-16/hypothetical protein SELMODRAFT_130759 [Selaginella moellendorffii] &gt;gi|300142336|gb|EFJ09038.1| hypothetical protein SELMODRAFT_130759 [Selaginella moellendorffii]	NA	sp|Q8LDQ4|TAP46_ARATH/6e-13/PP2A regulatory subunit TAP46 OS=Arabidopsis thaliana GN=TAP46 PE=1 SV=2	atr:18442322/3e-10/PP2A regulatory subunit TAP46; K17606 immunoglobulin-binding protein 1	NA	NA	biological_process:GO:0009966//regulation of signal transduction;GO:0034047//regulation of protein phosphatase type 2A activity;cellular_component:GO:0005829//cytosol;molecular_function:GO:0008601//protein phosphatase type 2A regulator activity;GO:0051721//protein phosphatase 2A binding;
Unigene19953_RS259A	gi|302806084|ref|XP_002984792.1|/9.14372e-25/hypothetical protein SELMODRAFT_121171 [Selaginella moellendorffii] &gt;gi|300147378|gb|EFJ14042.1| hypothetical protein SELMODRAFT_121171 [Selaginella moellendorffii]	NA	sp|Q9FY48|KEG_ARATH/2e-15/E3 ubiquitin-protein ligase KEG OS=Arabidopsis thaliana GN=KEG PE=1 SV=2	aip:107622319/3e-18/E3 ubiquitin-protein ligase KEG; K16279 E3 ubiquitin-protein ligase KEG [EC:2.7.11.1 2.3.2.27]	NA	NA	biological_process:GO:0006468//protein phosphorylation;GO:0009788//negative regulation of abscisic acid-activated signaling pathway;GO:0045324//late endosome to vacuole transport;cellular_component:GO:0005802//trans-Golgi network;GO:0005769//early endosome;molecular_function:GO:0004674//protein serine/threonine kinase activity;GO:0008270//zinc ion binding;GO:0004842//ubiquitin-protein transferase…
Unigene28426_RS259A	gi|294464739|gb|ADE77876.1|/4.13152e-18/unknown [Picea sitchensis]	NA	sp|Q9CAQ8|RFC5_ARATH/3e-16/Replication factor C subunit 5 OS=Arabidopsis thaliana GN=RFC5 PE=1 SV=1	brp:103830567/4e-16/replication factor C subunit 5; K10756 replication factor C subunit 3/5	NA	NA	biological_process:GO:0006261//DNA-dependent DNA replication;GO:0031348//negative regulation of defense response;cellular_component:GO:0005663//DNA replication factor C complex;molecular_function:GO:0005524//ATP binding;GO:0003689//DNA clamp loader activity;
Unigene30434_RS259A	gi|168049059|ref|XP_001776982.1|/2.29665e-15/predicted protein [Physcomitrella patens] &gt;gi|162671683|gb|EDQ58231.1| predicted protein [Physcomitrella patens]	NA	sp|F4JGZ1|MED16_ARATH/5e-14/Mediator of RNA polymerase II transcription subunit 16 OS=Arabidopsis thaliana GN=MED16 PE=1 SV=1	NA	NA	NA	biological_process:GO:0044699//single-organism process;GO:0006355//regulation of transcription, DNA-templated;GO:0048583//regulation of response to stimulus;cellular_component:GO:0016592//mediator complex;
Unigene36432_RS259A	gi|168026495|ref|XP_001765767.1|/9.25023e-41/predicted protein [Physcomitrella patens] &gt;gi|162682944|gb|EDQ69358.1| predicted protein [Physcomitrella patens]	gi|923667959|ref|XM_013794225.1|/5e-07/PREDICTED: Brassica napus uncharacterized LOC106354315 (LOC106354315), mRNA	NA	NA	NA	PTHR10044:SF101/7.9E-55/--	biological_process:GO:0016567//protein ubiquitination;GO:0009966//regulation of signal transduction;cellular_component:GO:0016021//integral component of membrane;GO:0005737//cytoplasm;molecular_function:GO:0008270//zinc ion binding;GO:0004842//ubiquitin-protein transferase activity;
Unigene38068_RS259A	gi|168002293|ref|XP_001753848.1|/4.79055e-37/predicted protein [Physcomitrella patens] &gt;gi|162694824|gb|EDQ81170.1| predicted protein [Physcomitrella patens]	gi|823146892|ref|XM_012617895.1|/3e-09/PREDICTED: Gossypium raimondii brefeldin A-inhibited guanine nucleotide-exchange protein 2-like (LOC105790339), mRNA	sp|Q9LPC5|BIG3_ARATH/3e-35/Brefeldin A-inhibited guanine nucleotide-exchange protein 3 OS=Arabidopsis thaliana GN=BIG3 PE=1 SV=1	bna:106405352/7e-36/brefeldin A-inhibited guanine nucleotide-exchange protein 2-like; K18442 brefeldin A-inhibited guanine nucleotide-exchange protein	SPAC30.01c/2e-08/---	PF12783/1.1E-26/Guanine nucleotide exchange factor in Golgi transport N-terminal	biological_process:GO:0032012//regulation of ARF protein signal transduction;GO:0043547//positive regulation of GTPase activity;GO:0016192//vesicle-mediated transport;cellular_component:GO:0005802//trans-Golgi network;molecular_function:GO:0005086//ARF guanyl-nucleotide exchange factor activity;
Unigene43222_RS259A	gi|167997627|ref|XP_001751520.1|/2.15298e-25/ETR1 ethylene receptor [Physcomitrella patens] &gt;gi|162697501|gb|EDQ83837.1| ETR1 ethylene receptor [Physcomitrella patens] &gt;gi|163644192|dbj|BAF95746.1| ethylene receptor homolog [Physcomitrella patens]	NA	sp|Q9XH57|ETR2_PELHO/1e-22/Ethylene receptor 2 OS=Pelargonium hortorum GN=ETR2 PE=2 SV=1	ppp:PHYPADRAFT_192265/4e-26/ETR7; ETR7 ethylene receptor; K14509 ethylene receptor [EC:2.7.13.-]	NA	NA	biological_process:GO:0010105//negative regulation of ethylene-activated signaling pathway;GO:0023014//signal transduction by protein phosphorylation;GO:0018106//peptidyl-histidine phosphorylation;cellular_component:GO:0016021//integral component of membrane;GO:0005789//endoplasmic reticulum membrane;molecular_function:GO:0051740//ethylene binding;GO:0038199//ethylene receptor activity;GO:0000155…
Unigene48876_RS259A	gi|586645876|ref|XP_006827802.1|/4.09503e-33/PREDICTED: mediator of RNA polymerase II transcription subunit 16 [Amborella trichopoda] &gt;gi|548832422|gb|ERM95218.1| hypothetical protein AMTR_s00009p00267330 [Amborella trichopoda]	NA	sp|F4JGZ1|MED16_ARATH/4e-31/Mediator of RNA polymerase II transcription subunit 16 OS=Arabidopsis thaliana GN=MED16 PE=1 SV=1	NA	NA	NA	biological_process:GO:0044707//single-multicellular organism process;GO:0010468//regulation of gene expression;GO:0006950//response to stress;GO:0009966//regulation of signal transduction;GO:0009628//response to abiotic stimulus;GO:0009755//hormone-mediated signaling pathway;cellular_component:GO:0005634//nucleus;
Unigene48940_RS259A	gi|302803881|ref|XP_002983693.1|/1.16134e-35/oligosaccharyltransferase subunit STT3 [Selaginella moellendorffii] &gt;gi|300148530|gb|EFJ15189.1| oligosaccharyltransferase subunit STT3 [Selaginella moellendorffii]	gi|743909687|ref|XM_011050028.1|/6e-29/PREDICTED: Populus euphratica dolichyl-diphosphooligosaccharide--protein glycosyltransferase subunit STT3A (LOC105142414), transcript variant X2, mRNA	sp|Q6F2Z1|STT3A_ORYSJ/3e-37/Dolichyl-diphosphooligosaccharide--protein glycosyltransferase subunit STT3A OS=Oryza sativa subsp. japonica GN=STT3A PE=2 SV=1	smo:SELMODRAFT_452919/2e-36/STT3A; oligosaccharyltransferase subunit STT3 (EC:2.4.1.119); K07151 dolichyl-diphosphooligosaccharide--protein glycosyltransferase [EC:2.4.99.18]	YGL022w/4e-17/---	PTHR13872/1.3E-52/--	biological_process:GO:0047484//regulation of response to osmotic stress;GO:0006486//protein glycosylation;GO:0009651//response to salt stress;cellular_component:GO:0005783//endoplasmic reticulum;GO:0016021//integral component of membrane;GO:0005886//plasma membrane;molecular_function:GO:0004579//dolichyl-diphosphooligosaccharide-protein glycotransferase activity;
Unigene49937_RS259A	gi|685304742|ref|XP_009143093.1|/1.37381e-12/PREDICTED: uncharacterized protein DDB_G0274915 [Brassica rapa] &gt;gi|923622656|ref|XP_013747964.1| PREDICTED: nuclear pore complex protein NUP62-like [Brassica napus]	NA	sp|Q9SIA8|DIR10_ARATH/9e-07/Dirigent protein 10 OS=Arabidopsis thaliana GN=DIR10 PE=2 SV=1	bna:106450764/2e-13/nuclear pore complex protein NUP62-like; K14306 nuclear pore complex protein Nup62	XF1267/9e-08/---	NA	biological_process:GO:0010930//negative regulation of auxin mediated signaling pathway;cellular_component:GO:0034399//nuclear periphery;GO:0005635//nuclear envelope;GO:0005829//cytosol;molecular_function:GO:0005515//protein binding;
