# Supplementary material for: Transcriptomic Evidence of Adaptive Evolution of the Epiphytic Fern Asplenium nidus
Source: Int J Genomics. 2019 Dec 1;2019:1429316. doi: 10.1155/2019/1429316 (PMC6913284; doi:10.1155/2019/1429316)
Supplement: Supplementary 4 — Table S3: GO annotation of positively selected genes in A. nidus. [file 1429316.f4.xlsx]

## Sheet: Sheet1
Table S3. GO annotation of positively selected genes in A. nidus
Gene ID	dn/ds	dn	ds	p-value	Function description						GO term
					Nr	Nt	Swissprot	KEGG	COG	Interpro
CL6726.Contig1_RS259A	2.25458	0.0167	0.0074	0.3239	gi|971518144|dbj|GAQ80069.1|/6.89646e-12/C2H2 zinc finger protein [Klebsormidium flaccidum]	NA	NA	NA	NA	PS51059/12.722/PARP catalytic domain profile.	NA
CL11175.Contig1_RS259A	1.40256	0.0215	0.0154	0.496	gi|116783969|gb|ABK23164.1|/2.77611e-41/unknown [Picea sitchensis] &gt;gi|148907138|gb|ABR16712.1| unknown [Picea sitchensis]	NA	sp|Q8LGG8|USPAL_ARATH/9e-09/Universal stress protein A-like protein OS=Arabidopsis thaliana GN=At3g01520 PE=1 SV=2	NA	lin1615/5e-07/---	PTHR31964:SF9/3.5E-38/--	NA
Unigene1154_RS259A	1.74535	0.0273	0.0156	0.4178	gi|116778505|gb|ABK20887.1|/1.24992e-15/unknown [Picea sitchensis]	gi|848885124|ref|XM_012987362.1|/4e-10/PREDICTED: Erythranthe guttatus floral homeotic protein DEFICIENS-like (LOC105963010), mRNA	NA	NA	NA	NA	cellular_component:GO:0016020//membrane;
CL12383.Contig1_RS259A	2.35552	0.0775	0.0329	0.308	gi|514779282|ref|XP_004969311.1|/2.47709e-44/PREDICTED: potassium channel AKT1-like [Setaria italica] &gt;gi|944241793|gb|KQL06101.1| hypothetical protein SETIT_000254mg [Setaria italica]	NA	sp|Q0JKV1|AKT1_ORYSJ/1e-44/Potassium channel AKT1 OS=Oryza sativa subsp. japonica GN=AKT1 PE=2 SV=1	vra:106763693/1e-33/potassium channel AKT1-like; K04908 potassium voltage-gated channel Eag-related subfamily H member 5	all2748/8e-13/---	PS50297/32.227/Ankyrin repeat region circular profile.	biological_process:GO:0006810//transport;
Unigene5756_RS259A	1.94325	0.0764	0.0393	0.3785	gi|514809798|ref|XP_004979716.1|/5.81845e-32/PREDICTED: uncharacterized protein LOC101759281 [Setaria italica] &gt;gi|944231001|gb|KQK95387.1| hypothetical protein SETIT_026465mg [Setaria italica]	gi|304635230|gb|GU967537.1|/5e-14/Nelumbo nucifera clone PRL-GN237-151 microsatellite sequence	NA	cic:CICLE_v10003480mg/8e-28/hypothetical protein; K15891 farnesol dehydrogenase [EC:1.1.1.216]	NA	PTHR12265/1.6E-40/--	NA
CL1750.Contig6_RS259A	1.37675	0.0887	0.0644	0.5024	gi|302784690|ref|XP_002974117.1|/5.09778e-59/hypothetical protein SELMODRAFT_100325, partial [Selaginella moellendorffii] &gt;gi|300158449|gb|EFJ25072.1| hypothetical protein SELMODRAFT_100325, partial [Selaginella moellendorffii]	NA	sp|Q93W93|FBK22_ARATH/2e-28/F-box/kelch-repeat protein At1g55270 OS=Arabidopsis thaliana GN=At1g55270 PE=2 SV=1	vvi:100267149/6e-11/ring canal kelch homolog; K10457 kelch-like protein 20	NA	SM00612/2.1E-7/--	NA
CL388.Contig3_RS259A	1.05374	0.0516	0.049	0.5905	gi|586716090|ref|XP_006847737.1|/5.96705e-176/PREDICTED: acetylornithine deacetylase [Amborella trichopoda] &gt;gi|548851006|gb|ERN09318.1| hypothetical protein AMTR_s00149p00098120 [Amborella trichopoda]	gi|769808215|ref|XM_006847674.2|/3e-08/PREDICTED: Amborella trichopoda acetylornithine deacetylase (LOC18437466), mRNA	sp|Q9C5C4|ARGE_ARATH/2e-170/Acetylornithine deacetylase OS=Arabidopsis thaliana GN=At4g17830 PE=2 SV=1	atr:18437466/1e-176/acetylornithine deacetylase; K01438 acetylornithine deacetylase [EC:3.5.1.16]	Ta0934m/1e-13/---	PTHR11014/2.3E-219/--	biological_process:GO:0008152//metabolic process;molecular_function:GO:0016787//hydrolase activity;
CL531.Contig1_RS259A	1.25603	0.0171	0.0136	0.5337	gi|695065578|ref|XP_009421381.1|/1.10469e-45/PREDICTED: uncharacterized protein LOC104000942 [Musa acuminata subsp. malaccensis]	NA	NA	mus:104000942/2e-46/uncharacterized protein LOC104000942; K17966 transmembrane protein 70, mitochondrial	NA	PTHR13281:SF0/2.1E-39/--	cellular_component:GO:0005739//mitochondrion;
CL12364.Contig1_RS259A	1.02763	0.0144	0.014	0.5982	gi|661889317|emb|CDP06904.1|/2.39718e-16/unnamed protein product [Coffea canephora]	NA	sp|Q9ZUX4|UMP2_ARATH/1e-13/Uncharacterized protein At2g27730, mitochondrial OS=Arabidopsis thaliana GN=At2g27730 PE=1 SV=1	NA	NA	NA	NA
p-value was obtained by Chi-square test
